# Supplementary material for: Quantifying mRNA in Highly Degraded Fixed Tissues by Nanostring Technology: A Comparative Study
Source: MDPI journal article supplement (doi:10.3390/mps7030040), 2024-05-07

## SUPPLEMENTARY MATERIAL

**Table S1.** Target gene elements present in the Nanostring CodeSet

| Gene symbol  | Accession number  | Position  | Target sequence                                                                                                |
|--------------|-------------------|-----------|----------------------------------------------------------------------------------------------------------------|
| AC015971.2.1 | ENST00000426549.1 | 305-404   | CTCCGACATTTCTCCTCCTCAGACTGGACTCCAAGACATTTAAATC<br>GCCACATTGAGACTATACGTAACATGGACCTGGAAAAGCTTAAA<br>AATATGAAGAGG |
| AC083884.8   | ENST00000434256.1 | 679-778   | AGATGGTCCCATCCTGGCATATTCTCAGGTACAATTTGGCCTCA<br>GAATACAGAAGCCCAGCACATCCAACCTATTACCATAAAAATACCA<br>GGAATGTTTTGG |
| ACTB         | NM_001101.2       | 1011-1110 | TGCAGAAGGAGATCACTGCCCTGGCACCCAGCACAATGAAGAT<br>CAAGATCATTGCTCCTCCTGAGCGCAAGTACTCCGTGTGGATC<br>GCCGGCTCCATCCT   |
| ADAM12       | NM_003474.4       | 1925-2024 | CAACGTGTACCTGCACGATGGGCACTCATGTCAGGATGTGGAC<br>GGCTACTGCTACAATGGCATCTGCCAGACTCACGAGCAGCAGT<br>GTGTCACGCTCTGG   |
| ADAM12_b     | NM_003474.5       | 639-738   | AGCAAAGAAGTATCATAAATCTGGAAAGAAATGAAGGTCTCAT<br>TGCCAGCAGTTTCACGGAACCCACTATCTGCAAGACGGTACT<br>GATGTCCTCCCTCG    |
| ADAMTS12_b   | NM_030955.2       | 1956-2055 | CAGAGGCACCAACATTTCCGGCAGATGCAGTGCAGTGAATTTGA<br>CACTGTTCCCTACAAGAATGAACTCTACCACTGGTTTCCCATTTT<br>TAACCCAGCACA  |
| ADAMTS12     | XM_011514147.1    | 3549-3648 | CTGGTTACATCCCTCAGTCTCTTCTCCATCCCTGTAGGGCTCC<br>ATATCTGGGCTGCTTAGAGTCTCCTGCCAACCTTGGGACACTA<br>GACTAAGAGGAAA    |
| AEBP1_b      | NM_001129.4       | 1464-1563 | CCCATTGGGATGGAGTCACACCGTATTGAGGACAACCAGATCC<br>GAGCCTCCTCATGCTGCGCCACGGCCTGGGGGCACAGCGCG<br>GCCGGCTCAACATGC    |
| AEBP1_c      | NM_001129.4       | 1724-1823 | CTTCTTCGTGGGCTTTCAGCAATGACAGCCAGACATGGGTGATG<br>TACACCAACGGCTATGAGGAAATGACCTTTTCATGGGAACGTGG<br>ACAAGGACACACCC |
| AEBP1        | NM_001129.4       | 2560-2659 | AGAAGAACCCCTTCGTGCTGGGAGCAAATCTGAACGGCGGCGA<br>GCGGCTAGTATCCTACCCCTACGATATGGCCCGCACGCTACC<br>CAGGAGCAGCTGCT    |
| AKT1         | NM_001014432.1    | 1276-1375 | GGACGGGCACATTAAGATCACAGACTTCGGGCTGTGCAAGGAG<br>GGGATCAAGGACGGTGCCACCATGAAGACCTTTTGCGGCACAC<br>CTGAGTACCTGGCC   |
| AKT2         | NM_001626.4       | 700-799   | AGGAGATGGAAGTGGCGGTCAGCAAGGCACGGGCTAAAGTGA<br>CCATGAATGACTTCGACTATCTCAAACCTCTTGGCAAGGGAACC<br>TTTGGCAAAGTCAT   |
| AKT3         | NM_005465.4       | 288-387   | GCCAGTTAATGAAAACAGAACGACCAAAGCCAAACACATTTATA<br>ATCAGATGTCTCCAGTGGACTACTGTTATAGAGAGAACATTTCA<br>TGATGATACTCC   |
| ATP1A1-AS1   | NR_027646.1       | 122-221   | CCTCGTGGGCTGTGTGAGGGCCGAGTGAATCGTGCATTTGCG<br>GTCTGAAATGCAGAAGACAGAAGATGAGCTCTGGCTCTTACC<br>TGCATGGCTGGTGG     |
| B2M          | NM_004048.2       | 236-335   | TACTGAAGAATGGAGAGAGAATTGAAAAAGTGGAGCATTTCAGA<br>CTTGTCTTTCAGCAAGGACTGGTCTTTCTATCTTGTACTACAC<br>TGAATTCACCCC    |
| BEST1        | NM_004183.3       | 1119-1218 | TGTTCTGGGTGCCCTGGGTGTGGTTTTGCCAACCTGTCAATGAA<br>GGCGTGGCTTGGAGGTGCAATCCGGGACCCTATCCTGCTCCA<br>GAGCCTGCTGAACGA  |
| BICC1        | NM_001080512.1    | 2156-2255 | CACGGTCAATCATATGTCAACATGCAGGCATTTGACTATGAACAG<br>AAGAAGCTATTAGCCACCAAAGCTATGTTAAAGAAACCAAGTGGT<br>GACGGAGGTCAG |
| CALM2        | NM_001743.3       | 869-968   | TGGAGTTGTAACCTCTGCGTGGACTATGGACAGTCAACAATATGT<br>ACTTAAAAGTTGCACTATTGCAAAACGGGTGTATTATCCAGGTA<br>CTCGTACACTAT  |
| CD68         | NM_001251.2       | 1141-1240 | ACCGTCCATCTTGCTGCCTCTCATCATCGGCCTGATCCTTCTT<br>GGCCTCCTCGCCCTGGTGTATTGCTTTCTGCATCATCCGGA<br>GACGCCATCCGC       |
| COL10A1      | NM_000493.3       | 136-235   | AACTTGGTTTACGAGTGTGTTTACGCTGAACGATACCAAATGCC<br>CACAGGCATAAAAGGCCCACTACCCAACCAAGACACAGTTC<br>TTCATTCCCTACA     |
| COL1A2       | NM_000089.3       | 2636-2735 | CCAATGGATTGCTGGTCTGCTGGTGTGCTGGTCAACCTGG<br>TGCTAAAGGAGAAAGAGGAGCCAAAGGGCCTAAGGGTAAAAC<br>GGTGTGTTGGTCC        |
| COL3A1       | NM_000090.3       | 181-280   | TTGGCACAAACAGGAAGCTGTTGAAGGAGGATGTTCCCATCTTG                                                                   |

|           |                    |           |                                                                                                               |
|-----------|--------------------|-----------|---------------------------------------------------------------------------------------------------------------|
|           |                    |           | GTCAGTCCTATGCGGATAGAGATGTCTGGAAGCCAGAACCATG<br>CCAAATATGTGTCT                                                 |
| COL3A1_b  | NM_000090.3        | 2263-2362 | CCTGGTGTCTGGTACTCCTGGTCTGCAAGGAATGCCTGGAG<br>AAAGAGGAGGCTTGGAAAGTCTGGTCCAAGGGTGACAAGGG<br>TGAACCAGGCGGTC      |
| COL5A1_b  | NM_000093.3        | 494-593   | CAGCCAGCAGATCTCCTGAAGGTTCTAGATTTTCACAACCTGCC<br>TGATGGAATAACAAAGACAACAGGCTTTTGCGCCACGCGGCGA<br>TCTTCCAAAGGCC  |
| COL5A1    | NM_000093.3        | 873-972   | AGTGGCACAGAATTGCTCTCAGCGTCCACAAGAAAAATGTAC<br>CTTGATCCTCGACTGTAAAAAGAAGACCACCAATTCTCGACC<br>GCAGCGACCACCC     |
| COL5A2    | NM_000393.3        | 4076-4175 | GGTTCATGCTACCCTGAAGTCACTCAGTAGTCAGATTGAAACCA<br>TGCGCAGCCCCGATGGCTCGAAAAAGCACCCAGCCCCGACGT<br>GTGATGACCTAAAG  |
| COL5A2_b  | NM_000393.3        | 5761-5860 | TGGAATTAGACCATTTGGCCTTTGAACTTTTCATAGGAAAAATGA<br>CCCAACATTTCTTAGCATGAGCTACCTCATCTCTAGAAGCTGGG<br>ATGGACTTACTA |
| COL6A1_b  | NM_001848.2        | 2303-2402 | CTCAGAGGGACACCACACCGCTCAACGTGCTCTGCAGCCCCG<br>GCATCCAGGTGGTCTCCGTGGGCATCAAAGACGTGTTTGACTT<br>CATCCAGGCTCAGA   |
| COL6A2    | NM_001849.2        | 1926-2025 | TCGTATCAGACGCTCCGAGAGCATTGGGTACACCAACTTAC<br>ACTGGAGAAGAACTTCGTATCAACGTGGTCAACAGGCTGGGT<br>GCCATCGCTAAGGA     |
| COL8A1    | NM_001850.3        | 2141-2240 | AGTGAAGTTTAAACAACTGCTGTATAACGGCAGACAGAATA<br>ACCCGCAGACAGGCATCTTACCTGTGAGTCCCTGGTGTCTA<br>CTACTTTGCATAC       |
| COLEC12   | NM_130386.2        | 901-1000  | ACACAAGCCAGGCTATCCAGCGAATCAAGAACGACTTTCAAAT<br>CTGCAGCAGGTTTTTCTTCAAGCCAAGAAGGACACGGATTGGC<br>TGAAGGAGAAAGT   |
| CTSK      | NM_000396.2        | 416-515   | TCTCATTCCCGCAGTAATGACACCCTTTATATCCAGAATGGGA<br>AGGTAGAGCCCCAGACTCTGTGACTATCGAAAGAAAGGATAT<br>GTTACTCTGTCA     |
| CXCL3     | NM_002090.2        | 541-640   | TCCCTGCCCTTACCAGAGCTGAAAAAGAAAAAGAGAACAGCAG<br>CTTTCTAGGGACAGCTGGAAAGGACTTAATGTGTTTGACTATTT<br>CTTACGAGGGTTC  |
| ECM1      | NM_004425.3        | 1346-1445 | TGTTGCCGCCACCCTCCAGCCCTACTCGGGATGAGTGCTTTG<br>CCCGTCGGGCTCCTACCCCAACTATGACCGGGACATCTTGAC<br>CATTGACATCGGTC    |
| FAP_b     | NM_004460.2        | 1491-1590 | GCATTGGAAGCTATCCTCCAAGCAAGAAGTGTGTTACTTGGCAT<br>CTAAGGAAAGAAAGGTGCCAATATTACACAGCAAGTTTCAGCGA<br>CTACGCCAAGTA  |
| FN1       | NM_212482.1        | 1777-1876 | GGGAATGGACATGCATTGCCTACTCGCAGCTTCGAGATCAGTG<br>CATTGTTGATGACATCACTTACAATGTGAACGACACATTCCACA<br>AGCGTCATGAAGA  |
| GAPDH     | NM_00125679<br>9.1 | 387-486   | GAACGGGAAGCTTGTATCAATGGAATCCCATCACCATCTTCC<br>AGGAGCGAGATCCCTCCAAAATCAAGTGGGGCGATGCTGGCG<br>CTGAGTACGTCGTG    |
| GUSB      | NM_000181.3        | 1900-1999 | CCGATTTTCATGACTGAACAGTCAACGACGAGAGTGCTGGGGAA<br>TAAAAGGGGATCTTCACTCGGCAGAGACAACCAAAAAGTGCA<br>GCGTTCCTTTTGGC  |
| HMBS      | NM_000190.3        | 316-415   | CATTGCTATGTCCACCACAGGGGACAAGATTCTTGATACTGCAC<br>TCTCTAAGATTGGAGAGAAAAGCCTGTTTACCAAGGAGCTTGA<br>CATGCCCTGGAG   |
| HPRT1     | NM_000194.1        | 241-340   | TGTGATGAAGGAGATGGGAGGCCATCACATTGTAGCCCTCTGT<br>GTGCTCAAGGGGGGCTATAAATTCTTGTGACCTGCTGGATTA<br>CATCAAAGCACTG    |
| INTS5     | NM_030628.1        | 3026-3125 | CCTCCACCGCAACATCGACCGCCTAGGTCTTTTCTCTGGCCGT<br>TTCCAGGCACCTTACCCTCACTCTCCTTCGACAGGGGACGT<br>AGCCTTTTCTTGCT    |
| INTS5_b   | NM_030628.1        | 685-784   | CCTTGCTGGATACCTCTGTTTACGATTCTCCACACTTTGACTGG<br>GTTGTGGCACATATTGGCTCCTCTTTTCTGGCACCATCATTTT<br>CCGGTTCTCTC    |
| ISM1      | NM_080826.1        | 109-208   | GCGGCCGCGGGCAACGCCAGCCAAGCCAGCTGCAGAATAAC<br>CTCAACGTGGGAAGTACACCACATCAGAAACCAGCTTTTCTCT<br>CTCCAAGAAGCAC     |
| ITGA5_b   | NM_002205.2        | 2629-2728 | AAGGTCAGCAGCTCCTATATGTGACCAGAGTTACGGGACTCAA<br>CTGCACCACCAATCACCCATTAAACCAAGGGCCTGGAGTTG<br>GATCCCGAGGGTTC    |
| ITGA5     | NM_002205.2        | 4114-4213 | GCCAGCTGCACTGATGCTGCCCTCATCTCTGCCCCAACCT<br>TCCCTCACCTTGGCACCAGACACCCAGGACTTATTTAAACTCTG<br>TTGCAAGTGCAAT     |
| KDM4A-AS1 | NR_033827.1        | 339-438   | ATGGCTGAGAATCCCTTGGACCCTGGAAGCACCTACTCCATGA<br>TGGCCCGCAGGAGGACCAAACTGGAGACAGTCTGGCTCTGA                      |

|                 |                       |           |                                                                                                               |
|-----------------|-----------------------|-----------|---------------------------------------------------------------------------------------------------------------|
|                 |                       |           | GAAACAGGAAGGAA                                                                                                |
| KLF16           | NM_031918.3           | 1521-1620 | CTCTGGGTTCTTCCAAAGAACATTTGACTCAGTGGGGTCCGGA<br>GGGAATCCTGGCTTATTTATTTTCTCTGTCTCGGGTGTGGGG<br>GCCCTAGCTCGCC    |
| KLF16_b         | NM_031918.3           | 2298-2397 | CCCCTTTTGTCCAGAACCCTGCTCCTCGCTTGGGGACAG<br>GGGGGCTTTGGATGGCACTGGTGTGCACCTGGACCCAGCCCC<br>GGCCTGGCAGGATCC      |
| MAP1S_b         | NM_018174.4           | 268-367   | ACCCTGGTCTCCTGAACCCATCAGACAAGTCCCTGTATGATGA<br>GCTCCGGAACCTTCTGTTGGACCCTGCCTCTCACAAGCTACTG<br>GTGTTGGCTGGGC   |
| MMP11           | NM_005940.3           | 703-802   | AGCAGCCAAGGCCCTGATGTCCGCCTTCTACACCTTTCGCTAC<br>CCTACTGAGTCTCAGCCAGATGACTGCAGGGGCGTTCAACACC<br>TATATGGCCAGCCC  |
| MMP13           | NM_002427.2           | 952-1051  | CTGGCGCTGCATCCTCAGCAGTTGATGCGGAGCTGTTTTTA<br>ACGAAATCATTTTGGCCAGAACTTCCAACCGTATTGATGCTGC<br>ATATGAGCACCTT     |
| MMP14           | NM_004995.2           | 1471-1570 | GACAAGATTGATGCTGCTCTTCTGGATGCCAATGGAAGAC<br>CTACTTCTTCCGTGGAACAAGTACTACCGTTTCAACGAAGAGC<br>TCAGGGCAGTGG       |
| MMP14_b         | NM_004995.3           | 2733-2832 | AAACCCCTGGCAGCCCTGTGCCTCTCGAATGTTAGCCTTGGAT<br>GGGGCTTTCACAGTTAGAAGAGCTGAAACCAGGGGTGCAGCTG<br>TCAGGTAGGGTGGG  |
| MMP2_b          | NM_004530.5           | 1719-1818 | AAACAGGACATTGATTTTGGTGCATCGCTCAGATCCGTGGTGA<br>GATCTTCTTCTTCAAGGACCGGTTTCAATTTGGCGGACTGTGACGC<br>CACGTGACAAGC |
| MYPOP           | NM_00101264<br>3.3    | 300-399   | CACGGGCCAGGAGGTGCAGAAGCGCTGGAACGACTTCAAGCG<br>CCGCACCAAGGAGAAGCTCGCTCGCGTCCGCACTCCACGCA<br>GGGCGCCGGGCCCGCC   |
| NCKAP5L         | NM_00103780<br>6.3    | 337-436   | GGCACTTGCCAGGCCAACGAAAACCAGCGGGAGACTTATGAG<br>CGTGTCTGGACGAGGTTGCCAACCATGTGGTACAGGCGTTGC<br>TGAACCAGAAGGAC    |
| PARG            | NM_003631.2           | 2581-2680 | GTGCTGGATCACAATGAATGTCTAATTATCACAGGTAAGTGC<br>GTACAGTGAATACACAGGCTATGCTGAGACATATCGTTGGTCCC<br>GGAGCCACGAAG    |
| PGK1            | NM_000291.2           | 1031-1130 | GCAAGAAGTATGCTGAGGCTGTCACTCGGGCTAAGCAGATTGT<br>GTGGAATGGTCTGTGGGGTATTTGAATGGGAAGCTTTTGCC<br>CGGGGAACCAAAGC    |
| PPIA            | NM_021130.3           | 316-415   | TCTATGGGGAGAAATTTGAAGATGAGAATTCATCCTAAAGCAT<br>ACGGGTCCTGGCATCTTGTCCATGGCAAATGCTGGACCCAACA<br>CAAATGGTCCCA    |
| PPP1CC          | NM_002710.2           | 268-367   | ACATCGACAGCATTATCCAACGGCTGCTGGAAGTGAGAGGGTC<br>CAAGCCTGGTAAGAATGTCCAGCTTCAAGGAGAATGAAATCAGA<br>GGACTGTGCTTAAA |
| PROX1           | NM_002763.3           | 1921-2020 | TCTCCTGTGCTCATAAAGTCCGAGTGCGGGGATCTTCAAGAT<br>ATGTCTGAAATATCACCTTATTCGGGAAGTGAATGCAGGAAGG<br>ATTGTCACCCAA     |
| PRRX1           | NM_022716.2           | 331-430   | GAAGGAATAGGCAACCTTCAATAGCAGCCAGCTGCAGGCTTT<br>GGAGCGTGTCTTGGAGCGGACACACTATCCTGATGCTTTTGTG<br>CGAGAAGACCTTGC   |
| RP11-247A12.2.1 | ENST0000037<br>2490.1 | 428-527   | CTCCCCATACCCGCACTCCCCATCGTGGCACTTCCCTTGTTC<br>AGTTTTATGGAGTGTGCGTCTGGCTCTCCAAGTACTTGAACC<br>GCTTGATGCATA      |
| RPL19           | NM_000981.3           | 316-415   | CCAATGCCGAATGCCAGAGAAGGTCACATGGATGAGGAGAAT<br>GAGGATTTTGCCTGGCTGCTCAGAAGATACCGTGAATCTAAG<br>AAGATCGATCGCCA    |
| SVEP1           | NM_153366.3           | 5726-5825 | AATGGCCACTCCTCAGGTGAGATTTATACAGTAGGTGCCGAAG<br>TCACATTTTCTGTGAGGAGGATACAGTTGATGGGAGTAACC<br>AAAATCACATGTT     |
| TBP             | NM_00117208<br>5.1    | 588-687   | ACAGTGAATCTTGGTTGTAACCTTGACCTAAAGACCATTGCACT<br>TCGTGCCCGAAACGCCGAATATAATCCAAGCGGTTTGTGCG<br>GTAATCATGAGGA    |
| TFEC            | NM_012252.2           | 891-990   | CTTCACTTGGCAGGTTGATTTAGGTGCTCATGTACCAAACAG<br>CAGAGCCATCCTGAGCAGAATTCAGTAGACTATTGCCAACAACT<br>GACTGTGTCTCA    |
| TGFBR1          | NM_004612.2           | 1256-1355 | GAATCCTTCAAACGTGCTGACATCTATGCAATGGGCTTAGTATT<br>CTGGGAAATTGCTCGACGATGTTCCATTGGTGAATTCATGAAG<br>ATTACCAACTGC   |
| THBS1           | NM_003246.2           | 3466-3565 | ACCCTCGTCACATAGGCTGGAAAGATTTACCGCCTACAGATG<br>GCGTCTCAGCCACAGGCCAAAGACGGGTTTATTAGAGTGGTG<br>ATGTATGAAGGGAA    |
| THBS2           | NM_003247.2           | 4461-4560 | AAACATCCTTGCAAATGGGTGTGACGCGGTTCCAGATGTGGAT<br>TTGGCAAACCTCATTTAAGTAAAAGGTTAGCAGAGCAAAGTGC<br>GGTCTTTAGCTG    |

|        |                    |           |                                                                                                             |
|--------|--------------------|-----------|-------------------------------------------------------------------------------------------------------------|
| ZNF444 | NM_00125379<br>2.1 | 1439-1538 | CCACTTGGCCTCTTCCTCTCCTCCTCCCTCCCATCGTCCTCCT<br>CCACCTGCGCCTCCCTTGTCTGAACTTCCCAACGCCTTCCTATT<br>CCTTCCAACCTC |
|--------|--------------------|-----------|-------------------------------------------------------------------------------------------------------------|

**Table S2.** Amplification primers used for ddPCR and qPCR analysis

| Gene  | Primer                                      | Length |
|-------|---------------------------------------------|--------|
| GAPDH | Fw- 5'-GCA CCG TCAA GGC TGA GAA C-3'        | 96     |
|       | Rev- 5'-CAT CGC CCC ACT TGA TTT TG-3'       |        |
| ACTB  | Fw -5'-GTG GAT CAG CAA GCA GGA GT-3'        | 95     |
|       | Rev 5'-AGG GTG TAA CGC AAC TAA GTC-3'       |        |
| AKT1  | Fw 5'-CCA CTG TCA TCG AAC GCA CCT-3'        | 77     |
|       | Rev 5'-CAC AGT CTG GAT GGC GGT TGT-3'       |        |
| AKT2  | Fw 5'-AAG CAG AGG CTT GGT GGG-3'            | 71     |
|       | Rev 5'-TTG ATG CTG AGG AAG AAC CTG-3'       |        |
| AKT3  | Fw 5'-TCG AGA GAG CGG GTG TTC T-3'          | 77     |
|       | Rev 5'-TGT AGA TAG TCC AAG GCA GAG A-3'     |        |
| KLF16 | Fw 5'-GTC AGA CCC AGA AAG GTG GA-3'         | 78     |
|       | Rev 5'-GGA CGG TTC TGG AAC AAA AG-3'        |        |
| HPRT1 | Fw 5'-GTG TCA TTA GTG AAA AGC A-3'          | 91     |
|       | Rev 5'-CGA TGT CAA TAG GAC TCC AGA TGT T-3' |        |

Figure S1 Agilent BioAnalyzer profiles of matched FFPE/BFPE pairs and respective RIN numbers.

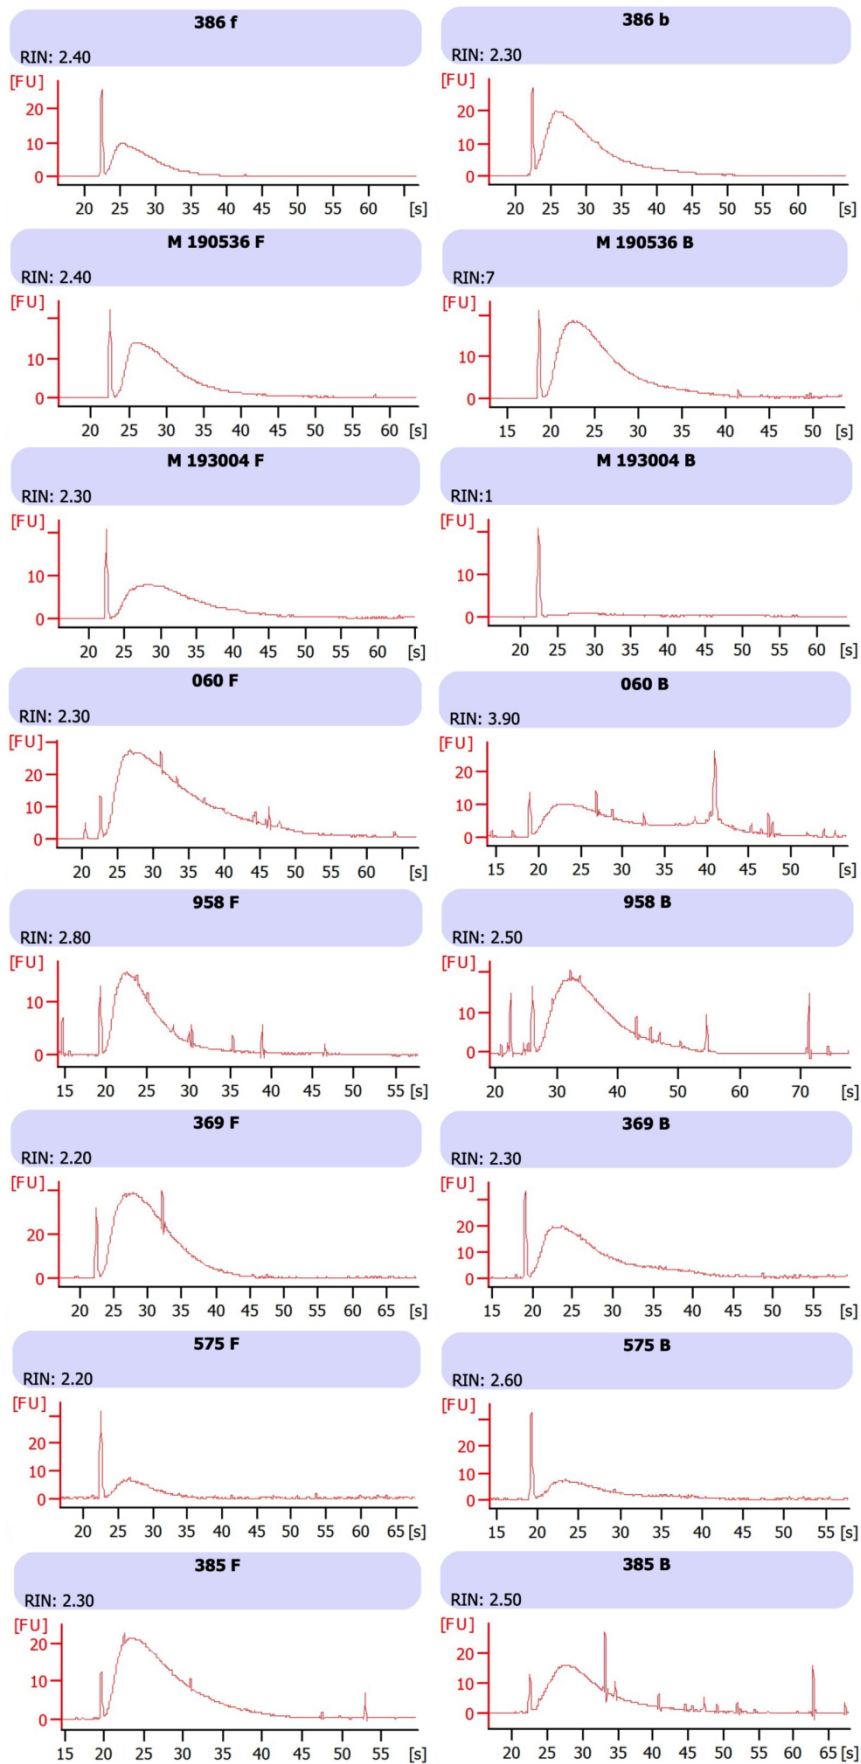

**Figure S2** Results of the isolation procedure in the eight matched formalin/Bouin's samples. (A) RNA yield after isolation. (B) RNA Integrity Number (RIN). (C) Percentage of RNA fragments according to different smear regions as measured by smear analysis on Agilent BioAnalyzer. (D, E) RNA purity as measured by A260/280 and A260/230 ratios on Nanodrop.

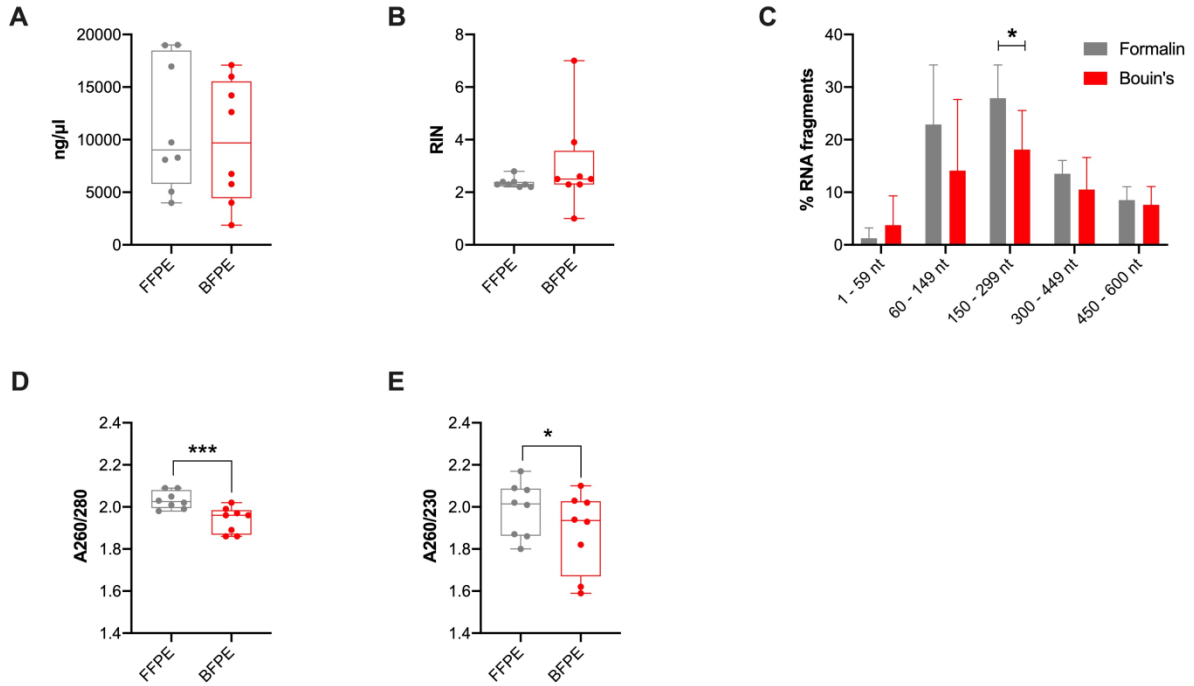

**Figure S3** Volcano plot for differentially expressed genes on matched formalin and Bouin's tissues identified on Nanostring, ddPCR and qPCR using raw data (C).

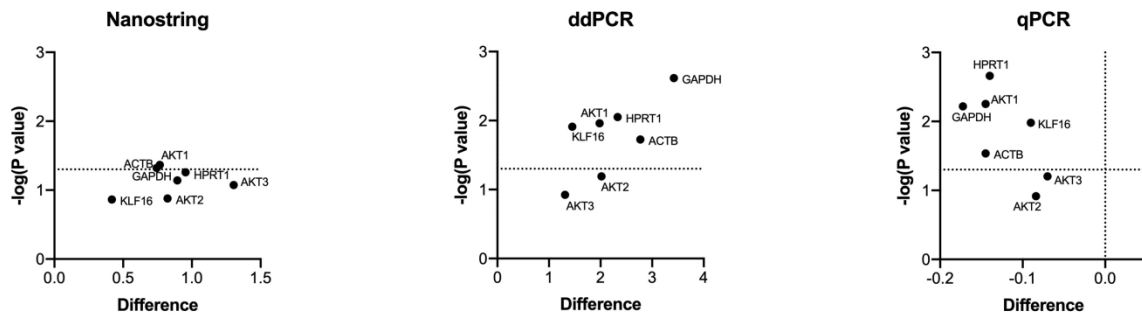

Supplement: s1 [file s1]
